# Supplementary material for: Study on the Radial and Axial Temperature Fields of Coal Roadway under Seasonal Fluctuation Boundary
Source: Hindawi journal article supplement (doi:10.1155/2019/2120618), 2019-01-01
Supplement: f1 [file 2120618.f1.zip]

Archive with 4 entries (3 files):
- supplementary information file/
- supplementary information file/Data.xlsx
- supplementary information file/Fig13-Fig20.opj
- supplementary information file/Fig8-Fig11.opj
