# Supplementary material for: Study on the Radial and Axial Temperature Fields of Coal Roadway under Seasonal Fluctuation Boundary
Source: Hindawi journal article supplement (doi:10.1155/2019/2120618), 2019-01-01
Supplement: f1 [file 2120618.f1.zip › supplementary information file/Data.xlsx]

## Sheet: Fig.8
	Calculated Result				Experimental Result
R	Aw	Aw	Aw	Aw	Aw	Aw	Aw	Aw
	4h	8h	12h	16h	4h	8h	12h	16h
0	0.743	0.781	0.801	0.815	0.742	0.776	0.804	0.811
1	0.278	0.37	0.424	0.461	0.252	0.377	0.444	0.491
2	0.104	0.175	0.224	0.261	0.117	0.174	0.233	0.247
3	0.039	0.083	0.118	0.148	0.038	0.082	0.119	0.144
4	0.015	0.039	0.063	0.084	0.015	0.036	0.09	0.101
5	0.005	0.019	0.033	0.047	0.005	0.019	0.04	0.055

## Sheet: Fig.9
	Calculated Result				Experimental Result
R	Aw	Aw	Aw	Aw	Aw	Aw	Aw	Aw
	2 m/s	3 m/s	4 m/s	5 m/s	2 m/s	3 m/s	4 m/s	5 m/s
0	0.745	0.801	0.835	0.859	0.732	0.804	0.843	0.831
1	0.394	0.424	0.442	0.454	0.39	0.444	0.447	0.397
2	0.208	0.224	0.234	0.24	0.206	0.233	0.222	0.217
3	0.11	0.118	0.124	0.127	0.095	0.119	0.111	0.122
4	0.058	0.063	0.065	0.067	0.072	0.09	0.066	0.071
5	0.031	0.033	0.035	0.035	0.039	0.04	0.035	0.038

## Sheet: Fig.10
	Calculated Result				Experimental Result
R	Delayed Phase	Delayed Phase	Delayed Phase	Delayed Phase	Delayed Phase	Delayed Phase	Delayed Phase	Delayed Phase
	4h	8h	12h	16h	4h	8h	12h	16h
0	0.166	0.129	0.111	0.099	0.159	0.109	0.093	0.101
1	1.063	0.772	0.64	0.56	1.105	0.722	0.609	0.665
2	1.96	1.416	1.17	1.022	1.87	1.438	1.088	1.119
3	2.858	2.059	1.699	1.483	2.862	2.174	1.614	1.388
4	3.755	2.702	2.229	1.944	3.923	2.631	2.25	2.02
5	4.653	3.346	2.758	2.405	4.708	3.333	2.69	2.311

## Sheet: Fig.11
	Theoretical Result				Experimental Result
R	Delayed Phase	Delayed Phase	Delayed Phase	Delayed Phase	Delayed Phase	Delayed Phase	Delayed Phase	Delayed Phase
	2m/s	3m/s	4m/s	5m/s	2m/s	3m/s	4m/s	5m/s
0	0.143	0.111	0.092	0.079	0.119	0.093	0.077	0.066
1	0.672	0.64	0.621	0.608	0.694	0.609	0.618	0.581
2	1.202	1.17	1.151	1.138	1.282	1.088	1.055	1.132
3	1.731	1.699	1.68	1.667	1.677	1.614	1.623	1.609
4	2.261	2.229	2.21	2.197	2.274	2.25	2.275	2.119
5	2.79	2.758	2.739	2.726	2.815	2.69	2.671	2.688

## Sheet: Fig. 13
	Axial Distance	Air Speed					Proportionality Coefficient
	m	0.5(m/s)	1(m/s)	3(m/s)	5(m/s)	7(m/s)	250
0	0	16	16	16	16	16
1	250	11.9455	13.6123	15.0892	15.4358	15.591
2	500	8.9184	11.5809	14.2303	14.8915	15.1925
3	750	6.6584	9.8526	13.4202	14.3664	14.8042
4	1000	4.9711	8.3823	12.6563	13.8598	14.4258
5	1250	3.7114	7.1314	11.9358	13.3711	14.0571
6	1500	2.7709	6.0671	11.2564	12.8996	13.6978
7	1750	2.0687	5.1617	10.6156	12.4447	13.3477
8	2000	1.5445	4.3914	10.0113	12.0059	13.0065
9	2250	1.1531	3.7361	9.4415	11.5826	12.6741
10	2500	0.8609	3.1785	8.904	11.1741	12.3501
11	2750	0.6427	2.7042	8.3971	10.7801	12.0345
12	3000	0.4799	2.3006	7.9191	10.4	11.7269
13	3250	0.3583	1.9573	7.4684	10.0333	11.4271
14	3500	0.2675	1.6652	7.0432	9.6795	11.135
15	3750	0.1997	1.4167	6.6423	9.3382	10.8504
16	4000	0.1491	1.2053	6.2642	9.0089	10.5731
17	4250	0.1113	1.0254	5.9076	8.6912	10.3029
18	4500	0.0831	0.8724	5.5713	8.3847	10.0395
19	4750	0.062	0.7422	5.2542	8.0891	9.7829
20	5000	0.0463	0.6314	4.9551	7.8038	9.5329
21	5250	0.0346	0.5372	4.673	7.5287	9.2892
22	5500	0.0258	0.457	4.407	7.2632	9.0518
23	5750	0.0193	0.3888	4.1561	7.0071	8.8204
24	6000	0.0144	0.3308	3.9196	6.76	8.595
25	6250	0.0107	0.2814	3.6964	6.5216	8.3753
26	6500	0.008	0.2394	3.486	6.2917	8.1612
27	6750	0.006	0.2037	3.2876	6.0698	7.9526
28	7000	0.0045	0.1733	3.1004	5.8558	7.7493
29	7250	0.0033	0.1474	2.9239	5.6493	7.5513
30	7500	0.0025	0.1254	2.7575	5.4501	7.3582
31	7750	0.0019	0.1067	2.6005	5.2579	7.1702
32	8000	0.0014	0.0908	2.4525	5.0725	6.9869
33	8250	0.001	0.0772	2.3129	4.8936	6.8083
34	8500	0.0008	0.0657	2.1812	4.7211	6.6343
35	8750	0.0006	0.0559	2.0571	4.5546	6.4647
36	9000	0.0004	0.0476	1.94	4.394	6.2995
37	9250	0.0003	0.0405	1.8295	4.2391	6.1385
38	9500	0.0002	0.0344	1.7254	4.0896	5.9816

## Sheet: Fig. 14
	Axial Distance	Radius					Proportionality Coefficient
	m	1(m)	2(m)	3(m)	4(m)	5(m)	250
0	0	16	16	16	16	16
1	250	12.2618	14.4418	15.0892	15.3815	15.5429
2	500	9.3971	13.0353	14.2303	14.7868	15.0988
3	750	7.2016	11.7658	13.4202	14.2152	14.6674
4	1000	5.519	10.62	12.6563	13.6657	14.2484
5	1250	4.2296	9.5857	11.9358	13.1374	13.8413
6	1500	3.2414	8.6521	11.2564	12.6295	13.4458
7	1750	2.4841	7.8095	10.6156	12.1413	13.0617
8	2000	1.9037	7.049	10.0113	11.6719	12.6885
9	2250	1.459	6.3625	9.4415	11.2207	12.326
10	2500	1.1181	5.7428	8.904	10.7869	11.9738
11	2750	0.8569	5.1835	8.3971	10.3699	11.6317
12	3000	0.6567	4.6787	7.9191	9.969	11.2994
13	3250	0.5033	4.2231	7.4684	9.5836	10.9766
14	3500	0.3857	3.8118	7.0432	9.2131	10.663
15	3750	0.2956	3.4406	6.6423	8.857	10.3583
16	4000	0.2265	3.1055	6.2642	8.5146	10.0624
17	4250	0.1736	2.8031	5.9076	8.1854	9.7749
18	4500	0.133	2.5301	5.5713	7.869	9.4956
19	4750	0.102	2.2837	5.2542	7.5648	9.2243
20	5000	0.0781	2.0613	4.9551	7.2723	8.9608
21	5250	0.0599	1.8605	4.673	6.9912	8.7048
22	5500	0.0459	1.6793	4.407	6.7209	8.4561
23	5750	0.0352	1.5158	4.1561	6.4611	8.2145
24	6000	0.027	1.3682	3.9196	6.2113	7.9798
25	6250	0.0207	1.2349	3.6964	5.9712	7.7518
26	6500	0.0158	1.1146	3.486	5.7404	7.5303
27	6750	0.0121	1.0061	3.2876	5.5185	7.3152
28	7000	0.0093	0.9081	3.1004	5.3051	7.1062
29	7250	0.0071	0.8197	2.9239	5.1	6.9031
30	7500	0.0055	0.7398	2.7575	4.9029	6.7059
31	7750	0.0042	0.6678	2.6005	4.7133	6.5143
32	8000	0.0032	0.6028	2.4525	4.5311	6.3282
33	8250	0.0025	0.5441	2.3129	4.356	6.1474
34	8500	0.0019	0.4911	2.1812	4.1876	5.9718
35	8750	0.0014	0.4432	2.0571	4.0257	5.8012
36	9000	0.0011	0.4001	1.94	3.8701	5.6354
37	9250	0.0008	0.3611	1.8295	3.7204	5.4744
38	9500	0.0006	0.3259	1.7254	3.5766	5.318

## Sheet: Fig. 15 
	Axial Distance	Air Speed					Proportionality Coefficient
	m	0.5(m/s)	1(m/s)	3(m/s)	5(m/s)	7(m/s)	250
0	0	0	0	0	0	0
1	250	0.1335	0.0834	0.0337	0.0212	0.0155
2	500	0.267	0.1668	0.0674	0.0424	0.031
3	750	0.4005	0.2502	0.1011	0.0636	0.0465
4	1000	0.534	0.3336	0.1348	0.0848	0.062
5	1250	0.6675	0.417	0.1684	0.1061	0.0775
6	1500	0.801	0.5004	0.2021	0.1273	0.093
7	1750	0.9345	0.5838	0.2358	0.1485	0.1085
8	2000	1.068	0.6672	0.2695	0.1697	0.124
9	2250	1.2015	0.7506	0.3032	0.1909	0.1395
10	2500	1.335	0.834	0.3369	0.2121	0.155
11	2750	1.4685	0.9174	0.3706	0.2333	0.1705
12	3000	1.602	1.0008	0.4043	0.2545	0.186
13	3250	1.7355	1.0842	0.438	0.2757	0.2015
14	3500	1.8689	1.1676	0.4717	0.2969	0.217
15	3750	2.0024	1.251	0.5053	0.3182	0.2325
16	4000	2.1359	1.3344	0.539	0.3394	0.248
17	4250	2.2694	1.4178	0.5727	0.3606	0.2635
18	4500	2.4029	1.5012	0.6064	0.3818	0.279
19	4750	2.5364	1.5846	0.6401	0.403	0.2945
20	5000	2.6699	1.668	0.6738	0.4242	0.31
21	5250	2.8034	1.7514	0.7075	0.4454	0.3255
22	5500	2.9369	1.8348	0.7412	0.4666	0.341
23	5750	3.0704	1.9182	0.7749	0.4878	0.3565
24	6000	3.2039	2.0016	0.8085	0.509	0.372
25	6250	3.3374	2.085	0.8422	0.5303	0.3875
26	6500	3.4709	2.1684	0.8759	0.5515	0.403
27	6750	3.6044	2.2518	0.9096	0.5727	0.4185
28	7000	3.7379	2.3353	0.9433	0.5939	0.434
29	7250	3.8714	2.4187	0.977	0.6151	0.4495
30	7500	4.0049	2.5021	1.0107	0.6363	0.465
31	7750	4.1384	2.5855	1.0444	0.6575	0.4805
32	8000	4.2719	2.6689	1.0781	0.6787	0.496
33	8250	4.4054	2.7523	1.1118	0.6999	0.5115
34	8500	4.5389	2.8357	1.1454	0.7211	0.527
35	8750	4.6724	2.9191	1.1791	0.7424	0.5425
36	9000	4.8059	3.0025	1.2128	0.7636	0.558
37	9250	4.9394	3.0859	1.2465	0.7848	0.5735
38	9500	5.0729	3.1693	1.2802	0.806	0.589

## Sheet: Fig. 16
	Axial Distance	Radius					Proportionality Coefficient
		1(m)	2(m)	3(m)	4(m)	5(m)	250
0	0	0	0	0	0	0
1	250	0.1123	0.0527	0.0337	0.0245	0.0191
2	500	0.2246	0.1053	0.0674	0.049	0.0383
3	750	0.3369	0.158	0.1011	0.0735	0.0574
4	1000	0.4491	0.2106	0.1348	0.098	0.0766
5	1250	0.5614	0.2633	0.1684	0.1226	0.0957
6	1500	0.6737	0.3159	0.2021	0.1471	0.1148
7	1750	0.786	0.3686	0.2358	0.1716	0.134
8	2000	0.8983	0.4212	0.2695	0.1961	0.1531
9	2250	1.0106	0.4739	0.3032	0.2206	0.1723
10	2500	1.1229	0.5265	0.3369	0.2451	0.1914
11	2750	1.2351	0.5792	0.3706	0.2696	0.2105
12	3000	1.3474	0.6319	0.4043	0.2941	0.2297
13	3250	1.4597	0.6845	0.438	0.3186	0.2488
14	3500	1.572	0.7372	0.4717	0.3431	0.268
15	3750	1.6843	0.7898	0.5053	0.3677	0.2871
16	4000	1.7966	0.8425	0.539	0.3922	0.3062
17	4250	1.9089	0.8951	0.5727	0.4167	0.3254
18	4500	2.0211	0.9478	0.6064	0.4412	0.3445
19	4750	2.1334	1.0004	0.6401	0.4657	0.3637
20	5000	2.2457	1.0531	0.6738	0.4902	0.3828
21	5250	2.358	1.1057	0.7075	0.5147	0.4019
22	5500	2.4703	1.1584	0.7412	0.5392	0.4211
23	5750	2.5826	1.2111	0.7749	0.5637	0.4402
24	6000	2.6949	1.2637	0.8085	0.5882	0.4593
25	6250	2.8071	1.3164	0.8422	0.6128	0.4785
26	6500	2.9194	1.369	0.8759	0.6373	0.4976
27	6750	3.0317	1.4217	0.9096	0.6618	0.5168
28	7000	3.144	1.4743	0.9433	0.6863	0.5359
29	7250	3.2563	1.527	0.977	0.7108	0.555
30	7500	3.3686	1.5796	1.0107	0.7353	0.5742
31	7750	3.4809	1.6323	1.0444	0.7598	0.5933
32	8000	3.5932	1.6849	1.0781	0.7843	0.6125
33	8250	3.7054	1.7376	1.1118	0.8088	0.6316
34	8500	3.8177	1.7902	1.1454	0.8334	0.6507
35	8750	3.93	1.8429	1.1791	0.8579	0.6699
36	9000	4.0423	1.8956	1.2128	0.8824	0.689
37	9250	4.1546	1.9482	1.2465	0.9069	0.7082
38	9500	4.2669	2.0009	1.2802	0.9314	0.7273

## Sheet: Fig. 17 
	Axial Distance/m	Airflow	Dimensionless Depth										Proportionality Coefficient
			0	1	2	3	4	5					500
0	0	16	14.8399	5.9212	2.3626	0.9427	0.3761	0.1501
1	500	14.2303	13.1985	5.2663	2.1013	0.8384	0.3345	0.1335
2	1000	12.6563	11.7386	4.6838	1.8689	0.7457	0.2975	0.1187
3	1500	11.2564	10.4402	4.1657	1.6621	0.6632	0.2646	0.1056
4	2000	10.0113	9.2855	3.705	1.4783	0.5899	0.2354	0.0939
5	2500	8.904	8.2584	3.2952	1.3148	0.5246	0.2093	0.0835
6	3000	7.9191	7.345	2.9307	1.1694	0.4666	0.1862	0.0743
7	3500	7.0432	6.5326	2.6065	1.04	0.415	0.1656	0.0661
8	4000	6.2642	5.81	2.3182	0.925	0.3691	0.1473	0.0588
9	4500	5.5713	5.1674	2.0618	0.8227	0.3283	0.131	0.0523
10	5000	4.9551	4.5958	1.8338	0.7317	0.2919	0.1165	0.0465
11	5500	4.407	4.0875	1.6309	0.6507	0.2597	0.1036	0.0413
Transposition
	0	500	1000	1500	2000	2500	3000	3500	4000	4500	5000	5500
0	14.8399	13.1985	11.7386	10.4402	9.2855	8.2584	7.345	6.5326	5.81	5.1674	4.5958	4.0875
1	5.9212	5.2663	4.6838	4.1657	3.705	3.2952	2.9307	2.6065	2.3182	2.0618	1.8338	1.6309
2	2.3626	2.1013	1.8689	1.6621	1.4783	1.3148	1.1694	1.04	0.925	0.8227	0.7317	0.6507
3	0.9427	0.8384	0.7457	0.6632	0.5899	0.5246	0.4666	0.415	0.3691	0.3283	0.2919	0.2597
4	0.3761	0.3345	0.2975	0.2646	0.2354	0.2093	0.1862	0.1656	0.1473	0.131	0.1165	0.1036
5	0.1501	0.1335	0.1187	0.1056	0.0939	0.0835	0.0743	0.0661	0.0588	0.0523	0.0465	0.0413

## Sheet: Fig. 18 
	Axial Distance/m	Airflow	Dimensionless Depth											Length proportionality coefficient
			0	1	2	3	4	5						500
0	0	0	0.0455	0.8724	1.6993	2.5262	3.3531	4.18
1	500	0.0674	0.1129	0.9398	1.7667	2.5936	3.4205	4.2474
2	1000	0.1348	0.1803	1.0072	1.8341	2.661	3.4879	4.3148
3	1500	0.2021	0.2477	1.0746	1.9015	2.7284	3.5553	4.3822
4	2000	0.2695	0.3151	1.142	1.9689	2.7958	3.6226	4.4495
5	2500	0.3369	0.3824	1.2093	2.0362	2.8631	3.69	4.5169
6	3000	0.4043	0.4498	1.2767	2.1036	2.9305	3.7574	4.5843
7	3500	0.4717	0.5172	1.3441	2.171	2.9979	3.8248	4.6517
8	4000	0.539	0.5846	1.4115	2.2384	3.0653	3.8922	4.7191
9	4500	0.6064	0.652	1.4789	2.3058	3.1326	3.9595	4.7864
10	5000	0.6738	0.7193	1.5462	2.3731	3.2	4.0269	4.8538
11	5500	0.7412	0.7867	1.6136	2.4405	3.2674	4.0943	4.9212
12	6000	0.8085	0.8541	1.681	2.5079	3.3348	4.1617	4.9886
Transposition
	0	500	1000	1500	2000	2500	3000	3500	4000	4500	5000	5500	6000
0	0.0455	0.1129	0.1803	0.2477	0.3151	0.3824	0.4498	0.5172	0.5846	0.652	0.7193	0.7867	0.8541
1	0.8724	0.9398	1.0072	1.0746	1.142	1.2093	1.2767	1.3441	1.4115	1.4789	1.5462	1.6136	1.681
2	1.6993	1.7667	1.8341	1.9015	1.9689	2.0362	2.1036	2.171	2.2384	2.3058	2.3731	2.4405	2.5079
3	2.5262	2.5936	2.661	2.7284	2.7958	2.8631	2.9305	2.9979	3.0653	3.1326	3.2	3.2674	3.3348
4	3.3531	3.4205	3.4879	3.5553	3.6226	3.69	3.7574	3.8248	3.8922	3.9595	4.0269	4.0943	4.1617
5	4.18	4.2474	4.3148	4.3822	4.4495	4.5169	4.5843	4.6517	4.7191	4.7864	4.8538	4.9212	4.9886

[truncated: 2 more sheets: Fig. 19, Fig. 20 ]
